# Supplementary material for: Three-Dimensional Imaging and Histopathological Features of Third Metacarpal/Tarsal Parasagittal Groove and Proximal Phalanx Sagittal Groove Fissures in Thoroughbred Horses
Source: MDPI journal article supplement (doi:10.3390/ani13182912), 2023-09-14
Supplement: s1 [file s1]

Supplementary Table S2 Details of histopathological scoring of fissures. CBCT (cone-beam CT). FBCT (fan-beam CT).

| Number of histopathological scoring of fissures      |   |                              |              |
|------------------------------------------------------|---|------------------------------|--------------|
|                                                      |   | <i>Microcracks/CBCT/FBCT</i> |              |
| <i>Histopathological score</i>                       |   | Without fissure              | With fissure |
| Reduced staining for glycosaminoglycans in cartilage | 0 | 29                           | 15           |
|                                                      | 1 | 13                           | 22           |
|                                                      | 2 | 12                           | 14           |
|                                                      | 3 | 24                           | 35           |
| Cartilage surface irregularity                       | 0 | 61                           | 62           |
|                                                      | 1 | 14                           | 6            |
|                                                      | 2 | 2                            | 6            |
|                                                      | 3 | 1                            | 12           |
| Cartilage fibrillation                               | 0 | 64                           | 73           |
|                                                      | 1 | 12                           | 7            |
|                                                      | 2 | 1                            | 5            |
|                                                      | 3 | 1                            | 1            |
| Cartilage thickness variation                        | 0 | 54                           | 48           |
|                                                      | 1 | 19                           | 21           |
|                                                      | 2 | 4                            | 13           |
|                                                      | 3 | 1                            | 4            |
| Irregular chondrocyte distribution                   | 0 | 26                           | 9            |
|                                                      | 1 | 26                           | 31           |
|                                                      | 2 | 20                           | 19           |
|                                                      | 3 | 6                            | 27           |
| Chondrocyte loss/necrosis                            | 0 | 11                           | 8            |
|                                                      | 1 | 29                           | 22           |
|                                                      | 2 | 28                           | 31           |
|                                                      | 3 | 10                           | 25           |
| Chondrocyte clustering                               | 0 | 22                           | 8            |
|                                                      | 1 | 50                           | 61           |
|                                                      | 2 | 4                            | 11           |
|                                                      | 3 | 2                            | 6            |
| Tidemark incongruence                                | 0 | 23                           | 1            |
|                                                      | 1 | 41                           | 42           |
|                                                      | 2 | 11                           | 32           |
|                                                      | 3 | 2                            | 10           |
| Calcified cartilage cleft                            | 0 | 76                           | 77           |
|                                                      | 1 | 0                            | 8            |
|                                                      | 2 | 0                            | 0            |
|                                                      | 3 | 1                            | 0            |
| Calcified cartilage depth variation                  | 0 | 36                           | 9            |
|                                                      | 1 | 22                           | 26           |
|                                                      | 2 | 6                            | 21           |
|                                                      | 3 | 13                           | 29           |

|                                                                  |   |    |    |
|------------------------------------------------------------------|---|----|----|
| Vascular invasion                                                | 0 | 64 | 13 |
|                                                                  | 1 | 6  | 32 |
|                                                                  | 2 | 1  | 26 |
|                                                                  | 3 | 6  | 14 |
| Island of hyaline cartilage in subchondral bone plate            | 0 | 36 | 53 |
|                                                                  | 1 | 27 | 24 |
|                                                                  | 2 | 0  | 4  |
|                                                                  | 3 | 14 | 4  |
| Sclerosis of subchondral bone plate and adjacent cancellous bone | 0 | 71 | 6  |
|                                                                  | 1 | 20 | 48 |
|                                                                  | 2 | 0  | 6  |
|                                                                  | 3 | 0  | 32 |
| Subchondral bone collapse                                        | 0 | 87 | 63 |
|                                                                  | 1 | 4  | 25 |
|                                                                  | 2 | 0  | 4  |
|                                                                  | 3 | 0  | 0  |
| Replacement of cancellous bone with compact bone                 | 0 | 47 | 6  |
|                                                                  | 1 | 32 | 23 |
|                                                                  | 2 | 7  | 36 |
|                                                                  | 3 | 1  | 26 |
| Trabecular thickening with reduced marrow spaces                 | 0 | 45 | 3  |
|                                                                  | 1 | 30 | 20 |
|                                                                  | 2 | 10 | 32 |
|                                                                  | 3 | 2  | 35 |
| Replacement with osteon/lamellar bone                            | 0 | 34 | 1  |
|                                                                  | 1 | 44 | 18 |
|                                                                  | 2 | 11 | 20 |
|                                                                  | 3 | 1  | 53 |
| Microcracks in cancellous bone                                   | 0 | 35 | 12 |
|                                                                  | 1 | 36 | 22 |
|                                                                  | 2 | 12 | 31 |
|                                                                  | 3 | 3  | 26 |
| Replacement with woven bone                                      | 0 | 52 | 27 |
|                                                                  | 1 | 30 | 46 |
|                                                                  | 2 | 8  | 18 |
|                                                                  | 3 | 0  | 0  |
| Howship's lacunae with/without osteoclast                        | 0 | 20 | 31 |
|                                                                  | 1 | 43 | 39 |
|                                                                  | 2 | 15 | 18 |
|                                                                  | 3 | 12 | 3  |
