# Supplementary material for: Three-Dimensional Imaging and Histopathological Features of Third Metacarpal/Tarsal Parasagittal Groove and Proximal Phalanx Sagittal Groove Fissures in Thoroughbred Horses
Source: MDPI journal article supplement (doi:10.3390/ani13182912), 2023-09-14
Supplement: s1 [file s1]

Supplementary Table S1      Details of fissure diagnosis. CBCT (cone-beam CT). FBCT (fan-beam CT). MRI-1 (MRI sequence set 1). MRI-2 (MRI sequences set 2).

| Number of fissures detected on imaging modalities compared with gold standard |         |                                    |      |
|-------------------------------------------------------------------------------|---------|------------------------------------|------|
|                                                                               |         | <i>Microcracks (gold standard)</i> |      |
| <i>Imaging</i>                                                                |         | Without                            | With |
| CBCT (diagnosis)                                                              | Without | 84                                 | 13   |
|                                                                               | With    | 53                                 | 100  |
| FBCT (diagnosis)                                                              | Without | 99                                 | 18   |
|                                                                               | With    | 38                                 | 95   |
| MRI-1 (diagnosis)                                                             | Without | 115                                | 62   |
|                                                                               | With    | 20                                 | 48   |
| MRI-2 (diagnosis)                                                             | Without | 108                                | 58   |
|                                                                               | With    | 16                                 | 35   |
| T1W 3D (detection)                                                            | Without | 123                                | 85   |
|                                                                               | With    | 11                                 | 25   |
| T2W FSE (detection)                                                           | Without | 122                                | 93   |
|                                                                               | With    | 12                                 | 17   |
| T2*W 3D (detection)                                                           | Without | 125                                | 95   |
|                                                                               | With    | 9                                  | 15   |
| STIR FSE (detection)                                                          | Without | 131                                | 101  |
|                                                                               | With    | 3                                  | 9    |
| PD SE (detection)                                                             | Without | 120                                | 80   |
|                                                                               | With    | 14                                 | 30   |
| T1W SE (detection)                                                            | Without | 120                                | 79   |
|                                                                               | With    | 14                                 | 31   |
| T1 GRE FAST (detection)                                                       | Without | 111                                | 75   |
|                                                                               | With    | 12                                 | 18   |
| T2W FSE FAST (detection)                                                      | Without | 116                                | 86   |
|                                                                               | With    | 7                                  | 7    |
| T2*W GRE FAST (detection)                                                     | Without | 114                                | 74   |
|                                                                               | With    | 9                                  | 19   |
| STIR FSE FAST (detection)                                                     | Without | 120                                | 91   |
|                                                                               | With    | 3                                  | 2    |
